# Supplementary material for: Circular retrotransposition products generated by a LINE retrotransposon
Source: PubMed Central journal article supplement (PMC3510499; doi:10.1093/nar/gks859), 2012-09-12
Supplement: supp_gks859_nar-01845-a-2012-File009.pdf [file supp_gks859_nar-01845-a-2012-File009.pdf]

## **SUPPLEMENTARY INFORMATION**

**Fig. S1.** Schematic of LM-PCR and classes of products obtained. LM-PCR was performed as described previously (40). This particular schematic shows a full-length insertions, but would be similar for short insertions. Linker length is not to scale.

**Fig. S2.** LM-PCR products formed from class B circles. E = EcoRI.

**Table S1.** List of yeast strains used in this study.

**Table S2.** List of primers used in this study.

Figure S1

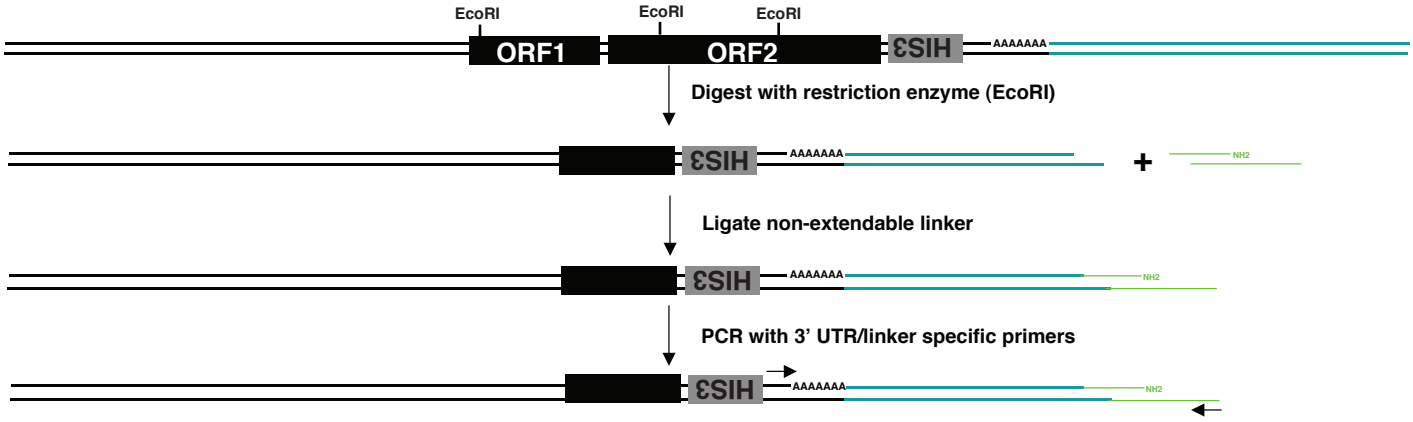

Sequence with mixture of polyA anchored primers, identify 3' flanking sequence (blue)

Class A:

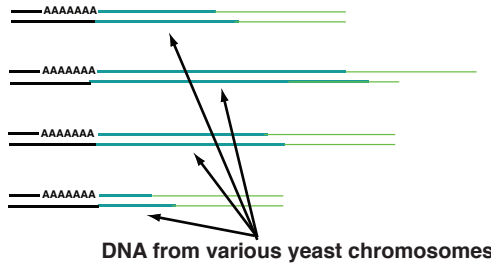

Class B-I:

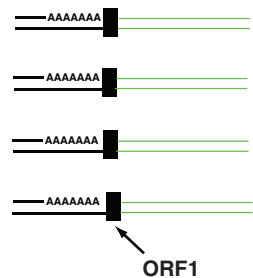

Class B-II:

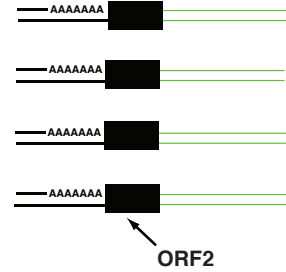

Fig. S1. Schematic of LM-PCR and classes of products obtained. LM-PCR was performed as described previously (40). This particular schematic shows a full-length insertion, but would be similar for short insertions. Linker length is not to scale.

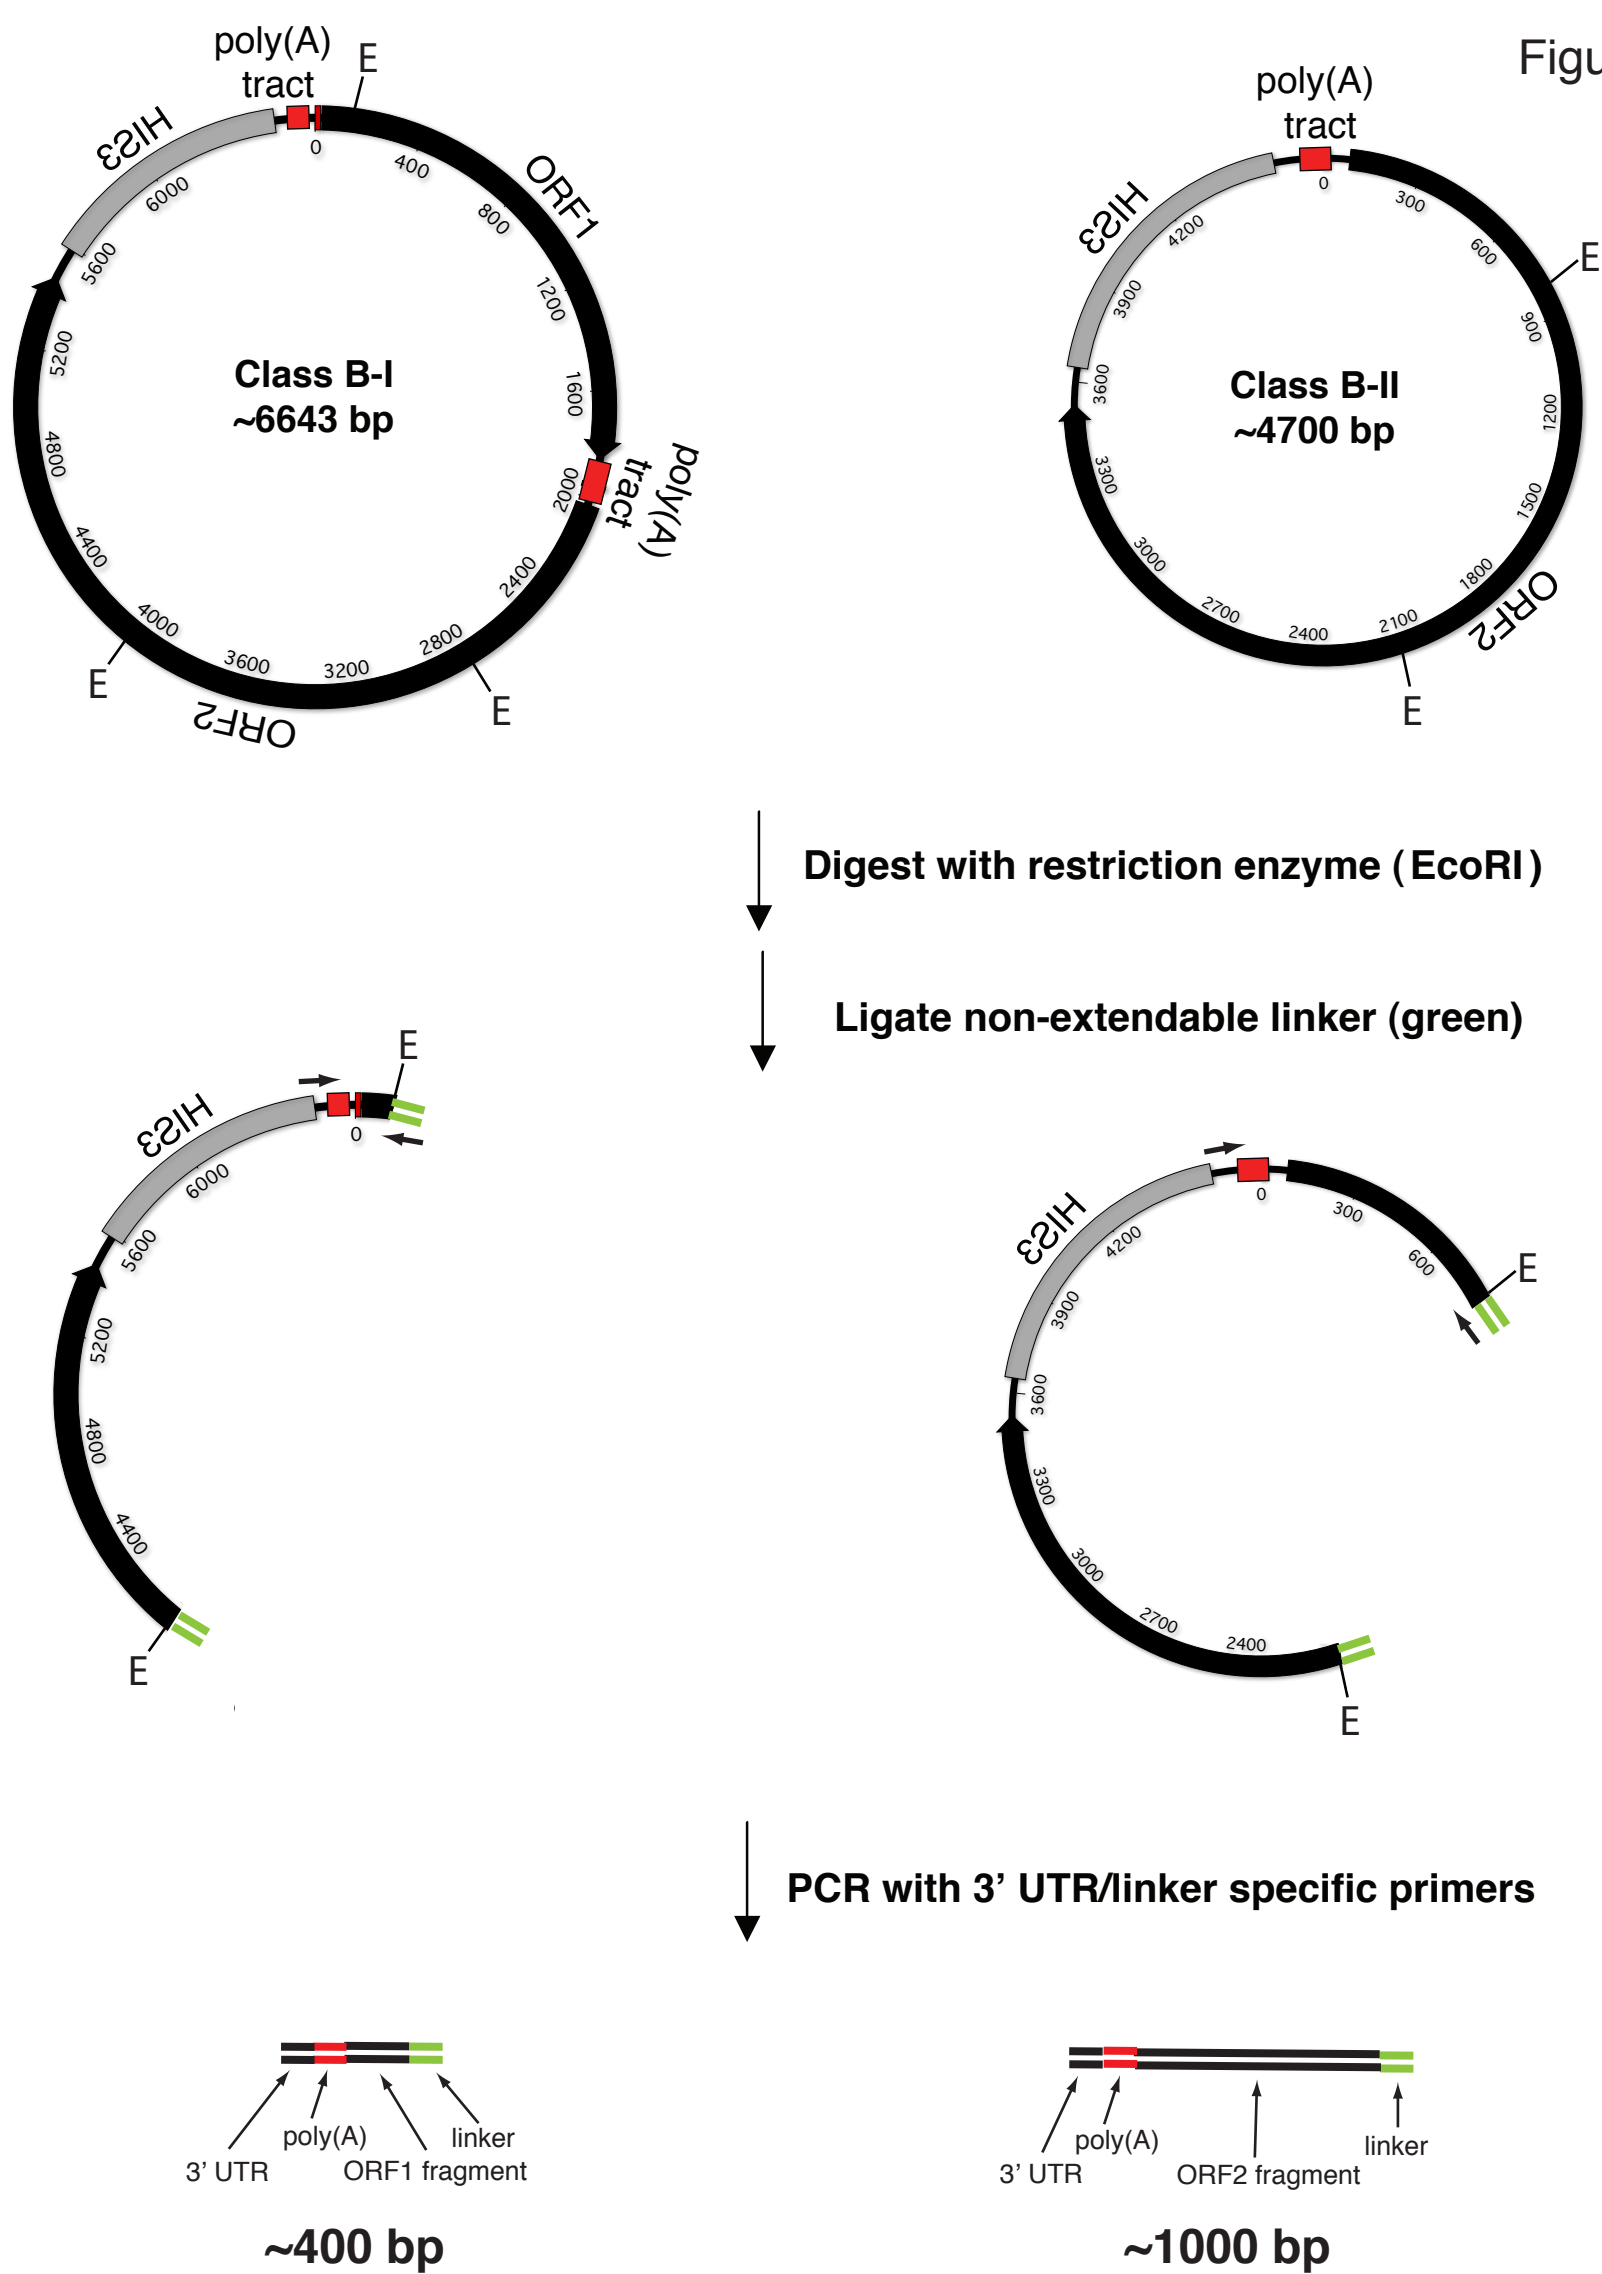

Fig. S2. LM-PCR products formed from class B circles. E = EcoRI.

**Table S1****Yeast Strains used in this study**

| <b>Strain</b> | <b>Genotype</b>                                                                                                                                                                     | <b>Comment</b>                              | <b>Reference</b>   |
|---------------|-------------------------------------------------------------------------------------------------------------------------------------------------------------------------------------|---------------------------------------------|--------------------|
| GRF167        | MAT $\alpha$ his3 $\Delta$ 200 ura3-167 GAL+                                                                                                                                        | Parent strain of JHY335, JHY339, JHY343     | Boeke et al (1985) |
| JHY335        | MAT $\alpha$ his3 $\Delta$ 200 ura3-167 GAL+ lys2 $\Delta$ ::mHIS3AI rad52 $\Delta$ ::hygro spt3 $\Delta$ ::KanMX                                                                   | "mHIS3AI" only                              | Dong et al (2009)  |
| JHY339        | MAT $\alpha$ his3 $\Delta$ 200 ura3-167 GAL+ lys2 $\Delta$ ::Zorro3mHIS3AI rad52 $\Delta$ ::hygro spt3 $\Delta$ ::KanMX                                                             | wt Zorro3mHIS3AI strain                     | Dong et al (2009)  |
| JHY343        | MAT $\alpha$ his3 $\Delta$ 200 ura3-167 GAL+ lys2 $\Delta$ ::Zorro3pA mHIS3AI rad52 $\Delta$ ::hygro spt3 $\Delta$ ::KanMX                                                          | Zorro3pA mHIS3AI strain                     | This study         |
| JHY868        | MAT $\alpha$ his3 $\Delta$ 200 leu2 $\Delta$ 0 ura3 $\Delta$ 0 lys2 $\Delta$ ::Gal1Zorro3mHIS3AI RME1(ins-308A) TAO3(E1493Q) MKT1(D30G)                                             | Figure 6B "wt"                              | This study         |
| JHY881        | MAT $\alpha$ his3 $\Delta$ 200 leu2 $\Delta$ 0 ura3 $\Delta$ 0 lys2 $\Delta$ ::Gal1Zorro3mHIS3AI rad1 $\Delta$ ::URA3 RME1(ins-308A) TAO3(E1493Q) MKT1(D30G)                        | Figure 6B "rad1 $\Delta$ "                  | This study         |
| JHY885        | MAT $\alpha$ his3 $\Delta$ 200 leu2 $\Delta$ 0 ura3 $\Delta$ 0 lys2 $\Delta$ ::Gal1Zorro3mHIS3AI rad10 $\Delta$ ::URA3 RME1(ins-308A) TAO3(E1493Q) MKT1(D30G)                       | Figure 6B "rad10 $\Delta$ "                 | This study         |
| JHY889        | MAT $\alpha$ his3 $\Delta$ 200 leu2 $\Delta$ 0 ura3 $\Delta$ 0 lys2 $\Delta$ ::Gal1Zorro3mHIS3AI mus81 $\Delta$ ::URA3 RME1(ins-308A) TAO3(E1493Q) MKT1(D30G)                       | Figure 6B "mus81 $\Delta$ "                 | This study         |
| JHY893        | MAT $\alpha$ his3 $\Delta$ 200 leu2 $\Delta$ 0 ura3 $\Delta$ 0 lys2 $\Delta$ ::Gal1Zorro3mHIS3AI mms4 $\Delta$ ::URA3 RME1(ins-308A) TAO3(E1493Q) MKT1(D30G)                        | Figure 6B "mms4 $\Delta$ "                  | This study         |
| JHY897        | MAT $\alpha$ his3 $\Delta$ 200 leu2 $\Delta$ 0 ura3 $\Delta$ 0 lys2 $\Delta$ ::Gal1Zorro3mHIS3AI slx1 $\Delta$ ::URA3 RME1(ins-308A) TAO3(E1493Q) MKT1(D30G)                        | Figure 6B "slx1 $\Delta$ "                  | This study         |
| JHY901        | MAT $\alpha$ his3 $\Delta$ 200 leu2 $\Delta$ 0 ura3 $\Delta$ 0 lys2 $\Delta$ ::Gal1Zorro3mHIS3AI slx4 $\Delta$ ::URA3 RME1(ins-308A) TAO3(E1493Q) MKT1(D30G)                        | Figure 6B "slx4 $\Delta$ "                  | This study         |
| JHY905        | MAT $\alpha$ his3 $\Delta$ 200 leu2 $\Delta$ 0 ura3 $\Delta$ 0 lys2 $\Delta$ ::Gal1Zorro3mHIS3AI rnh1 $\Delta$ ::URA3 RME1(ins-308A) TAO3(E1493Q) MKT1(D30G)                        | Figure 6B "rnh1 $\Delta$ "                  | This study         |
| JHY909        | MAT $\alpha$ his3 $\Delta$ 200 leu2 $\Delta$ 0 ura3 $\Delta$ 0 lys2 $\Delta$ ::Gal1Zorro3mHIS3AI rnh201 $\Delta$ ::URA3 RME1(ins-308A) TAO3(E1493Q) MKT1(D30G)                      | Figure 6B "rnh201 $\Delta$ "                | This study         |
| JHY924        | MAT $\alpha$ his3 $\Delta$ 200 leu2 $\Delta$ 0 ura3 $\Delta$ 0 lys2 $\Delta$ ::Gal1Zorro3mHIS3AI rad1 $\Delta$ ::URA3 slx4 $\Delta$ ::URA3 RME1(ins-308A) TAO3(E1493Q) MKT1(D30G)   | Figure 6B "rad1 $\Delta$ /slx4 $\Delta$ "   | This study         |
| JHY928        | MAT $\alpha$ his3 $\Delta$ 200 leu2 $\Delta$ 0 ura3 $\Delta$ 0 lys2 $\Delta$ ::Gal1Zorro3mHIS3AI rnh1 $\Delta$ ::URA3 rnh201 $\Delta$ ::URA3 RME1(ins-308A) TAO3(E1493Q) MKT1(D30G) | Figure 6B "rnh1 $\Delta$ /rnh201 $\Delta$ " | This study         |

**Table S2**  
**Oligonucleotides used in this study**

| Oligo  | Sequence                                                               | Comment                          |
|--------|------------------------------------------------------------------------|----------------------------------|
| JH950  | ttaagcggccgcaattcCTAGAGCTCGTGATCAGCCTCGA                               | BGHP(A) signal cloning           |
| JH951  | ttaagcggccccaattgTCCCAGCATGCCTGCTATTGTCTT                              | BGHP(A) signal cloning           |
| JH952  | ttaagcggccgcGTTGACATTGATTATTGACTAGTTATTAATAGTAATCA                     | CMV promoter cloning             |
| JH953  | ttaagcggccgcttaattaaGAGCTCTGCTTATATAGACCTCCCA                          | CMV promoter cloning             |
| JH954  | ttaagcggccggatccCCTTTATGTGTAACCTTTGGCTGAAGCT                           | EBV oriP cloning                 |
| JH955  | ttaagcggccgcaattcGCAGGAAAAGGACAAGCAGCGAAAATTCA                         | EBV oriP cloning                 |
| JH976  | ttaagcggccgcagatctAAACGACCCAACACCCGTGCGTTTTATT                         | SV40neo with intron cloning      |
| JH977  | ttaagcggccgcGGATCCGGCTTACGGTATCGATCAGCTGTGGA                           | SV40neo with intron cloning      |
| JH774  | GATTGTAACCCCTCGTATGTTTTAT                                              | class B cPCR primer              |
| JH775  | CACCTTTATCAGCAAAAATCAAAACCA                                            | class B cPCR primer              |
| JH776  | TAGGATTCATTTCTTTCATTACAGT                                              | class B cPCR primer              |
| JH944  | TGCTAAATGTGTAAAAAATATTGCACTATCCTGTTGAAAATATcaccataccacagcttttcaattca   | RAD1 KO primer                   |
| JH945  | TCGCATTTTATACTGATGTTTTAACAGGGTTCGTTAAATTAACAcaccgcataggtaataactgat     | RAD1 KO primer                   |
| JH843  | ACTTATGAGACAGCCACGCAACCAAAAAAGGGCATAAAACAAAGTcaccataccacagcttttcaattca | RAD10 KO primer                  |
| JH844  | AGGATGGTAATAAGCATGGAACAGATTTATTAAGAAAATAGGAcaccgcataggtaataactgat      | RAD10 KO primer                  |
| JH845  | TTTCAAAGGATTGATACGAACACACATTCTAGCATGAAAGCATcaccataccacagcttttcaattca   | MUS81 KO primer                  |
| JH846  | TTTTCTTTATAAAACCTTGCAGGGATGACTATATTTCAAATTGCTAcaccgcataggtaataactgat   | MUS81 KO primer                  |
| JH946  | ATGGTATAGAATAATAGTAGTCACATATTGCAGCTAGTTAAATGAcaccataccacagcttttcaattca | MMS4 KO primer                   |
| JH947  | CTGCCCTAAGGTATGTTCTTATATACAAAGTTTCGTTTCGATCATcaccgcataggtaataactgat    | MMS4 KO primer                   |
| JH847  | TTCTCTTTTTCAAAAAATATTA AAAAGATAAGAAAGGTACCAcaccataccacagcttttcaattca   | SLX1 KO primer                   |
| JH848  | CATTATCTATAGAAAAAAGAACCGAAAATTGTGTCAGGCCCTAcaccgcataggtaataactgat      | SLX1 KO primer                   |
| JH849  | GTTCCATAAATAAACAGTAGTTCAAGTTGGGAACTTAATAATcaccataccacagcttttcaattca    | SLX4 KO primer                   |
| JH850  | TTTTTTTTTTTTTTTTGTCAAATTTCTCAATCATTGGCACTAcaccgcataggtaataactgat       | SLX4 KO primer                   |
| JH868  | GTGTCACTCCTTGCTTATCGAAGGAACTATCGATTCTAATATcaccataccacagcttttcaattca    | RNH1 KO primer                   |
| JH869  | TAGCTATGAATAAAAGTAAAAATAAACACAACTCAACTGTGGACGAcaccgcataggtaataactgat   | RNH1 KO primer                   |
| JH870  | AACCTTGAACAACACTACTGCACACCAAATGATACGATTAATAcaccataccacagcttttcaattca   | RNH201 KO primer                 |
| JH871  | AGTATTACATGAAGATATATAGTATGTGCAAACTGGAGGTGATCaccgcataggtaataactgat      | RNH201 KO primer                 |
| JH328  | TTATTATGACTACGAACGGTACTAATGG                                           | primer to make Zorro3mHIS3 probe |
| JH329  | taatacgactcactataggagaCTCAACATATATTTAGTCTTATATACAGGTATA                | primer to make Zorro3mHIS3 probe |
| CD15   | ATGAGAGAAGTTATTAGTATTAATGTCGGT                                         | primer to make tubulin probe     |
| CD16   | taatacgactcactataggagaTAAAAATCTCTTCTCCTCAGCGTATGA                      | primer to make tubulin probe     |
| JH1012 | CTTTGCATATGCCGCCACT                                                    | nested PCR primer                |
| JH1013 | GGCGTGAATTTTCGCTGCTT                                                   | nested PCR primer                |
| JH1014 | GGCAGGATCTCCTGTCATCT                                                   | nested PCR primer                |
| JH1015 | GCTCCTGCCGAGAAAGTATC                                                   | nested PCR primer                |
| JH1016 | CGCCTTCTTGACGAGTTCTT                                                   | nested PCR primer                |
| JH1017 | GGGATCGGAATAAAAAAGAC                                                   | nested PCR primer                |
| JH1018 | CCTTGTGCTGCTGTAGGT                                                     | nested PCR primer                |
| JH1019 | AGATCTTCTCCAGGTGGTG                                                    | nested PCR primer                |
| JH1020 | TGAAGCGGTAGATCACCTG                                                    | nested PCR primer                |
| JH1021 | ATGGCCATCTTCACGATGTT                                                   | nested PCR primer                |
| JH1022 | TAGAAGCTGTTGGGCAGGAT                                                   | nested PCR primer                |
| JH1023 | TTCTCGATGCTCTGGAACAG                                                   | nested PCR primer                |
| JH1024 | ATCTCGTTGTGCACCCAGTA                                                   | nested PCR primer                |
| JH1025 | TCTGGGTCAGGTTCTTGATG                                                   | nested PCR primer                |
| JH1026 | GTTCAGGCCGTTGATGTTT                                                    | nested PCR primer                |
| JH1027 | AGGATGGTGATGTGGCTGT                                                    | nested PCR primer                |
| JH1028 | CACTTCTCGGTGTTGGTGAT                                                   | nested PCR primer                |
| JH1029 | GATGCACCTCCAGGTTCT                                                     | nested PCR primer                |
